# Supplementary material
Source: publisher figshare collection journal article supplement (https://sage.figshare.com/ndownloader/files/22708676)
Supplement: Supplementary file 1 [file 22708676]

## Factor 3: Sharing is caring

| -5                                                    | -4                                                      | -3                                                           | -2                                                                           | -1                                                           | 0                                                        | 1                                                                    | 2                                                                                           | 3                                                                  | 4                                                  | 5                                         |
|-------------------------------------------------------|---------------------------------------------------------|--------------------------------------------------------------|------------------------------------------------------------------------------|--------------------------------------------------------------|----------------------------------------------------------|----------------------------------------------------------------------|---------------------------------------------------------------------------------------------|--------------------------------------------------------------------|----------------------------------------------------|-------------------------------------------|
| 41. Selfies open the door to abuse                    | 43. Selfies reassure us that we are who we think we are | 29. Selfies bear little resemblance to real life             | 45. Selfies say 'I'm proud of this'                                          | 46. Selfies tell the world 'I am important'                  | 37. Selfies can help you feel like you are not alone     | 23. Selfies are an invitation for opinions                           | 42. Selfies provide a taste of what it is like to be a celebrity                            | 38. Selfies help you empathise with others                         | 35. Selfies display humanity at its very best      | 32. Selfies capture meaningful moments    |
| 34. Group selfies show the connections between people | 39. Selfies make you feel like you are in the spotlight | 4. Filters are part of the fun of selfies                    | 22. Selfies are a way of shaping how you look and hopefully how you are seen | 44. Selfies say 'I love my life'                             | 36. Selfies equal 'best look'                            | 33. Selfies communicate the message "I value myself".                | 40. Selfies make you look popular                                                           | 26. Selfies are manipulative                                       | 17. Selfies are a way of saying 'This is who I am' | 19. Selfies are a way of sharing feelings |
|                                                       | 30. Selfies can boost self esteem                       | 1. Getting a lot of likes makes you feel good about yourself | 21. Selfies are about getting recognition from others                        | 24. Selfies are better when they are of a group              | 28. Selfies are just about what you're doing day to day  | 18. Selfies are a way of seeking confirmation that your life is good | 31. Selfies can speak to many with a single picture                                         | 20. Selfies are a way to share experiences with friends and family | 5. Filters can make you look more like yourself    |                                           |
|                                                       |                                                         | 47. People can be judgmental about selfies                   | 7. Once you post a selfie, it's not yours anymore                            | 9. Posting selfies is a way to feel better about yourself    | 25. Selfies are just fun!                                | 14. Selfies are a bid for approval                                   | 27. Selfies are narcissistic (e.g. all about how much you love yourself)                    | 10. Posting selfies is about being less confident                  |                                                    |                                           |
|                                                       |                                                         |                                                              | 3. Filters are part of presenting your best self to the world                | 2. A selfie is an expression of who you are                  | 16. Selfies are a way of getting feedback on outfits     | 13. Selfies show an ideal self rather than a real self               | 15. Selfies are a good way to show support for a cause (e.g. no makeup selfies for charity) |                                                                    |                                                    |                                           |
|                                                       |                                                         |                                                              |                                                                              | 8. Posting lots of selfies is acceptable in this digital age | 11. Posting selfies is just part of everyday life online | 12. Selfie posting is a symptom of the need for love                 |                                                                                             |                                                                    |                                                    |                                           |
|                                                       |                                                         |                                                              |                                                                              |                                                              | 6. Millennials (people your age) are all about selfies   |                                                                      |                                                                                             |                                                                    |                                                    |                                           |
